# Supplementary material for: Evaluation of laser direct infrared imaging for rapid analysis of pharmaceutical tablets
Source: Royal Society of Chemistry journal article supplement (doi:10.1039/d2ay00471b), 2022-01-01
Supplement: d2ay00471b1.pdf [file d2ay00471b1.pdf]

# Evaluation of Laser Direct Infrared Imaging for Rapid Analysis of Pharmaceutical Tablets

## Supplementary Material

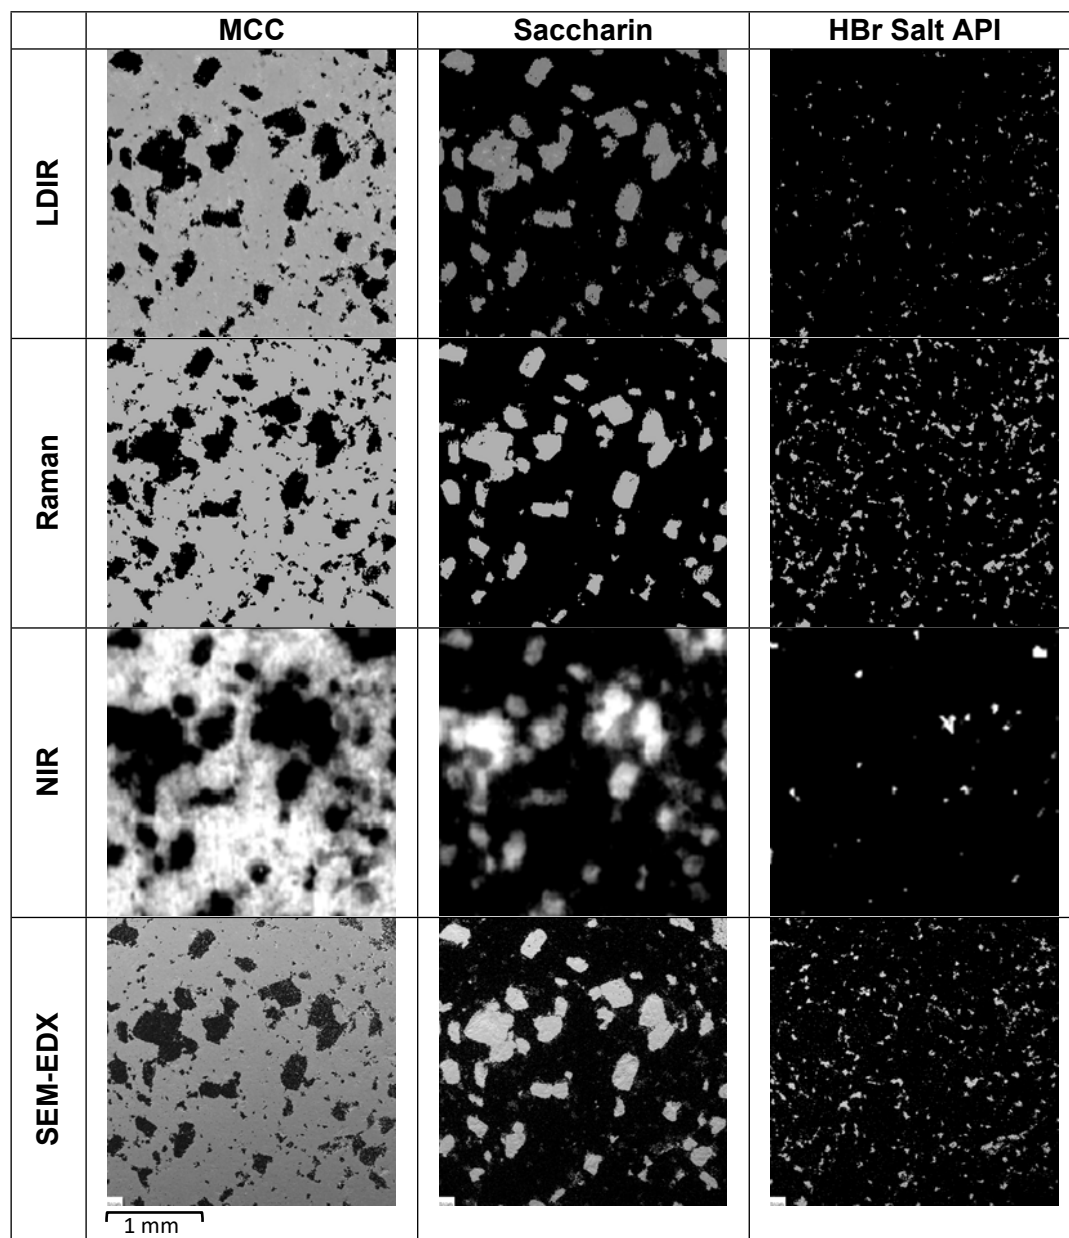

**Figure S1.** Single component distribution maps of the individual components in the three-component model system obtained by LDIR, Raman, NIR and SEM-EDX.

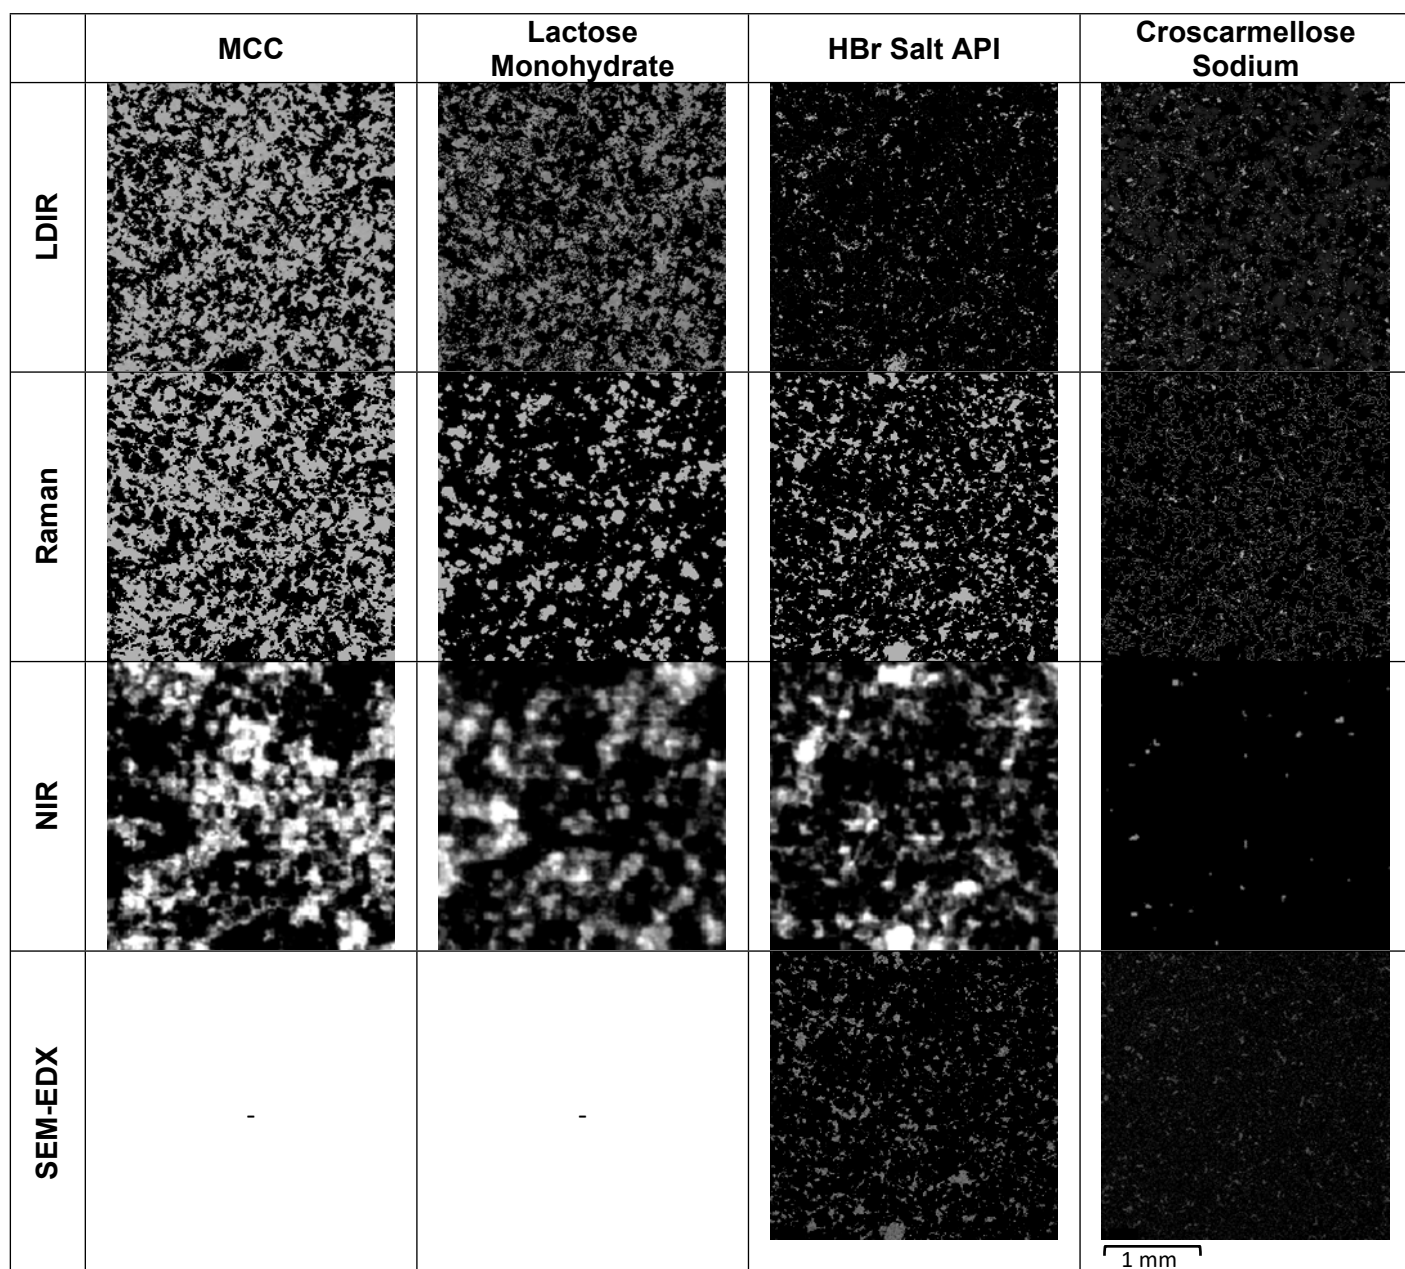

**Figure S2.** Single component distribution maps of the individual components in the pharmaceutical tablet formulation obtained by LDIR, Raman, NIR and SEM-EDX. Due to the chemical nature of the formulation, SEM-EDX could not distinguish between MCC and lactose monohydrate.
